# Supplementary material for: Long-Term Mortality after Transcatheter Edge-to-Edge Mitral Valve Repair Significantly Decreased over the Last Decade: Comparison between Initial and Current Experience from the MiTra Ulm Registry
Source: MDPI journal article supplement (doi:10.3390/jcm13082172), 2024-04-10
Supplement: s1 [file s1]

**Table S1.** Baseline characteristics of study population vs. lost to follow-up.

|                                            | Included in study<br>(n=677) | Lost to follow-up<br>(n=73) | p-value |
|--------------------------------------------|------------------------------|-----------------------------|---------|
| <b>Age (years)</b>                         | 76 ± 8                       | 78 ± 7                      | 0.166   |
| <b>Male (%)</b>                            | 402 (59.4)                   | 44 (60.3)                   | 0.875   |
| <b>Functional MR (%)</b>                   | 401 (59.3)                   | 39 (53.4)                   | 0.137   |
| <b>NYHA class</b>                          |                              |                             |         |
| I-II (%)                                   | 99(14.6)                     | 9(12.3)                     | 0.574   |
| III (%)                                    | 332 (49.0)                   | 31 (42.4)                   | 0.148   |
| IV (%)                                     | 246(36.3)                    | 32 (43.8)                   | 0.086   |
| <b>Prior heart failure hospitalization</b> | 338 (49.9)                   | 36 (49.3)                   | 0.891   |
| <b>Prior interventions</b>                 |                              |                             |         |
| PCI (%)                                    | 308(45.5)                    | 31 (42.5)                   | 0.580   |
| CABG (%)                                   | 108 (16)                     | 15 (20.5)                   | 0.515   |
| <b>Comorbidities</b>                       |                              |                             |         |
| CAD (%)                                    | 469 (69.3)                   | 52 (71.2)                   | 0.711   |
| DCM (%)                                    | 123(18.26)                   | 11(15.1)                    | 0.471   |
| Hypertension (%)                           | 544 (80.4)                   | 59 (80.8)                   | 0.918   |
| Diabetes (%)                               | 192(28.3)                    | 24 (32.9)                   | 0.372   |
| Atrial fibrillation (%)                    | 441 (65.1)                   | 49 (67.1)                   | 0.717   |
| COPD (%)                                   | 84 (12.4)                    | 9 (12.3)                    | 0.981   |
| Chronic renal failure (%)                  | 365 (53.4)                   | 35 (47.9)                   | 0.280   |
| CRT (%)                                    | 66 (9.7)                     | 4 (5.5)                     | 0.196   |
| <b>Euro Score II</b>                       | 8.4 ± 8.2                    | 7.8 ± 8.2                   | 0.755   |
| <b>Therapy</b>                             |                              |                             |         |
| ACEI (%)                                   | 319 (47.1)                   | 33 (45.2)                   | 0.738   |
| ARB (%)                                    | 185 (27.3)                   | 17 (23.3)                   | 0.421   |
| ARNI (%)                                   | 78 (11.5)                    | 7 (9.5)                     | 0.482   |
| Beta-blockers (%)                          | 586 (86.7)                   | 63(86.3)                    | 0.931   |
| Aldosterone antagonists (%)                | 304 (44.9)                   | 26 (35.6)                   | 0.083   |
| <b>Laboratory</b>                          |                              |                             |         |
| Troponin T (ng/l)                          | 87 ± 144                     | 111 ± 153                   | 0.123   |
| NT-pro-BNP (pg/ml)                         | 6601 ± 7238                  | 6595 ± 7398                 | 0.698   |
| <b>Echocardiography</b>                    |                              |                             |         |
| LVEF (%)                                   | 44±17                        | 48±15                       | 0.082   |
| LVESD (mm)                                 | 47±15                        | 48±17                       | 0.654   |
| sPAP (mmHg)                                | 59±17                        | 62±18                       | 0.446   |
| Severe TR                                  | 253(37.3)                    | 31(43.1)                    | 0.288   |

ACEI – angiotensin converting enzyme inhibitor, ARB- angiotensin II receptor blocker, ARNI - angiotensin receptor II Blocker - neprilysin inhibitor, CABG – coronary artery bypass grafting, COPD – chronic obstructive pulmonary disease, CRT – cardiac resynchronization therapy, GFR – glomerular filtration rate, ICD – implantable cardiac defibrillators, , MI – myocardial infarction, PCI – percutaneous coronary artery intervention;.

**Table S2.** Baseline laboratory values of study population.

|                                  | <b>Initially treated<br/>(n=340)</b> | <b>Recently treated (n=337)</b> | <b>p-value</b> |
|----------------------------------|--------------------------------------|---------------------------------|----------------|
| GFR (ml/min/1.73m <sup>2</sup> ) | 46 ± 18                              | 49 ± 20                         | 0.137          |
| Creatinine (μmol/l)              | 132±68                               | 130±71                          | 0.745          |
| Troponin T (ng/l)                | 139 ± 211                            | 43 ± 98                         | 0.021          |
| NT-pro-BNP (pg/ml)               | 7264 ± 7011                          | 5995 ± 7398                     | 0.001          |
| INR                              | 1.3±0.5                              | 1.4±0.6                         | 0.537          |
| PTT (s)                          | 39±22                                | 37±12                           | 0.165          |
| Hb(g/dl)                         | 12.9±3.1                             | 12.2±1.9                        | 0.174          |
| Platelets (Giga/L)               | 198±85                               | 197±75                          | 0.869          |

**Table S3.** Multivariable predictors for all-cause mortality (Cox regression model).

| <b>Predictors of 3-yr all-cause death for<br/>patients treated between 2010-2016</b> | <b>HR</b> | <b>95%-CI</b> | <b>P Value</b> |
|--------------------------------------------------------------------------------------|-----------|---------------|----------------|
| Severe tricuspid regurgitation                                                       | 3.08      | 1.05-8.97     | 0.039          |
| Severe pulmonary hypertension (s-PAP> 60 mmHg)                                       | 2.18      | 1.09-4.72     | 0.047          |
| LV end systolic diameter > 56 mm                                                     | 2.12      | 1.01-4.46     | 0.047          |
| NYHA class IV                                                                        | 1.91      | 1.03-3.54     | 0.038          |
| Prior heart failure hospitalization                                                  | 2.30      | 0.97-5.47     | 0.057          |
| LV ejection fraction <30%                                                            | 1.41      | 0.61-3.24     | 0.416          |
| LA v wave pressure                                                                   | 1.01      | 0.99-1.02     | 0.160          |
| Atrial fibrillation                                                                  | 1.30      | 0.74-2.28     | 0.351          |
| <b>Predictors of 3-yr all-cause death for<br/>patients treated between 2016-2019</b> | <b>HR</b> | <b>95%-CI</b> | <b>P Value</b> |
| Severe tricuspid regurgitation                                                       | 3.85      | 2.10-7.05     | <0.001         |
| LV EF < 30%                                                                          | 3.96      | 2.13-7.35     | <0.001         |
| NYHA class IV                                                                        | 1.96      | 1.05-3.77     | 0.034          |
| NT-pro BNP                                                                           | 1.01      | 0.95-1        | 0.223          |
| Postprocedural v-wave LA pressure                                                    | 1.02      | 0.99-1.05     | 0.105          |
| Renal failure                                                                        | 1.44      | 0.78-2.66     | 0.236          |

LA, left atrium, LV, left ventricle; s-PAP, systolic pulmonary artery pressure;.
